# Supplementary material for: Preparation of organic–inorganic hybrid Fe–MoOx/polyaniline nanorods as efficient catalysts for alkene epoxidation
Source: Royal Society of Chemistry journal article supplement (doi:10.1039/c1cc15642j), 2011-11-17
Supplement: c1cc15642j.pdf [file c1cc15642j.pdf]

## Electronic Supplementary Information (ESI)

### Preparation of Organic-Inorganic Hybrid Fe-MoO<sub>x</sub>/Polyaniline Nanorods as Efficient Catalysts for Alkene Epoxidation

Qingsheng Gao,<sup>\*ab</sup> Sinong Wang,<sup>a</sup> Yi Tang,<sup>\*a</sup> and Cristina Giordano<sup>b</sup>

<sup>a</sup> Department of Chemistry and Shanghai Key Laboratory of Molecular Catalysis, Fudan University, Shanghai 200433 (P. R. China). E-mail: qingshenggao@fudan.edu.cn, yitang@fudan.edu.cn.

<sup>b</sup> Max-Planck-Institute of Colloids and Interfaces, Colloid Chemistry, Am Mühlenberg, D-14476 Potsdam, Germany. Fax: +49-331-567-9502; Tel: +49-331-567-9501; E-mail: qingsheng.gao@mpikg.mpg.de.

#### Experimental section:

The precursor of Mo<sub>3</sub>O<sub>10</sub>(C<sub>6</sub>H<sub>5</sub>NH<sub>3</sub>)<sub>2</sub>·2H<sub>2</sub>O nanowires was prepared through co-precipitation process. 2.48 g of ammonium heptamolybdate ((NH<sub>4</sub>)<sub>6</sub>Mo<sub>7</sub>O<sub>24</sub>·4H<sub>2</sub>O) was dissolved in 40 ml of distilled water, and 3.34 g of aniline was added into the above solution. Afterwards, aqueous HCl (1 M) was dropwise added with magnetic stirring at room temperature until white precipitate appeared (pH 4~5). After a reaction with stirring at 50 °C in oil bath for 2 hours, the product was filtrated and washed with ethanol, and dried at 50 °C. Other precursors of Mo<sub>8</sub>O<sub>24</sub>(C<sub>6</sub>H<sub>5</sub>NH<sub>3</sub>)<sub>4</sub>·2H<sub>2</sub>O bulks and Mo<sub>6</sub>O<sub>19</sub>(C<sub>6</sub>H<sub>5</sub>NH<sub>3</sub>)<sub>2</sub> needles were obtained through the similar process except changing the pH level to 2 and 1, respectively.

The synthesis of Fe-MoO<sub>x</sub>/PANI nanorods was conducted as follow: 0.672 g of Mo<sub>3</sub>O<sub>10</sub>(C<sub>6</sub>H<sub>5</sub>NH<sub>3</sub>)<sub>2</sub>·2H<sub>2</sub>O nanowires were dispersed in 20 mL of H<sub>2</sub>O, and then 10 mL aqueous solution containing 0.162 g of FeCl<sub>3</sub> was added, using 1M HCl to adjust the pH level to 1. After treating at 50 °C for 2 hours, the deep-green product was filtrated and washed with water for 3 times, and then dried at 50 °C overnight. The synthesis of Fe-MoO<sub>x</sub>/PANI employing with other precursors of (NH<sub>4</sub>)<sub>6</sub>Mo<sub>7</sub>O<sub>24</sub>·4H<sub>2</sub>O, Mo<sub>8</sub>O<sub>24</sub>(C<sub>6</sub>H<sub>5</sub>NH<sub>3</sub>)<sub>4</sub>·2H<sub>2</sub>O and Mo<sub>6</sub>O<sub>19</sub>(C<sub>6</sub>H<sub>5</sub>NH<sub>3</sub>)<sub>2</sub> was carried out through the similar process.

MoO<sub>x</sub>/PANI nanorods were synthesized as follow: 0.672 g of Mo<sub>3</sub>O<sub>10</sub>(C<sub>6</sub>H<sub>5</sub>NH<sub>3</sub>)<sub>2</sub>·2H<sub>2</sub>O nanowires were dispersed in 40 mL of H<sub>2</sub>O, and then 0.572 g (NH<sub>4</sub>)<sub>2</sub>S<sub>2</sub>O<sub>8</sub> was added. Afterwards,

1 M HCl aqueous solution was added until pH =1. After 5 hours reaction at room temperature, the deep-green product was filtrated and washed with water, and then dried at 50 °C overnight.

MoO<sub>3</sub> nanowires were obtained through calcining Mo<sub>3</sub>O<sub>10</sub>(C<sub>6</sub>H<sub>5</sub>NH<sub>3</sub>)<sub>2</sub>·2H<sub>2</sub>O nanowires under air flow at 400 °C for 5 hours.

Physical measurement: XRD measurements were performed on a D8 Diffractometer from Bruker instruments (Cu K $\alpha$  radiation,  $\lambda$  = 0.154 nm) equipped with a scintillation counter. TEM images were taken using a Zeiss EM 912 $\Omega$  operated at an acceleration voltage of 120 kV. The samples were dispersed in ethanol by sonication and then supported onto a holey carbon film on a copper grid. EDS measurement for element mapping was carried out on FETEM (JEM-2100F). SEM measurement was performed on a LEO 1550 Gemini instrument. The samples were loaded on carbon coated stubs and coated by sputtering an Au/Pd alloy prior to imaging. The IR spectra were collected with a BIORAD FTS 6000 FTIR spectrometer, equipped with an attenuated total reflection (ATR) setup. Nitrogen sorption experiments were done with a Quantachrome Autosorb-1 or Quadrasorb at liquid nitrogen temperature, and data analysis were performed by Quantachrome software. All the samples were degassed at 150 °C for 20 h before measurements. CHN elemental analysis was done using a Vario EL Elementar.

The epoxidation of cis-cyclooctene was carried out using t-butyl hydroperoxide (TBHP, 80 wt% in water) as an oxidizing agent. The experimental procedure is as follows: cis-cyclooctene (1.0 ml) and Mo-based catalyst (0.04 g) were stirred at ca. 60 °C in CHCl<sub>3</sub> (4.0 ml) and TBHP (2.4 ml) for 4 h. The product was analyzed by GC-MS using an internal standard technique. For the recycle test of Mo-catalysts, the catalyst was centrifuged out and washed with EtOH for 3 times, and then dried at 50 °C. The recycled catalysts were used the same as the process described above.

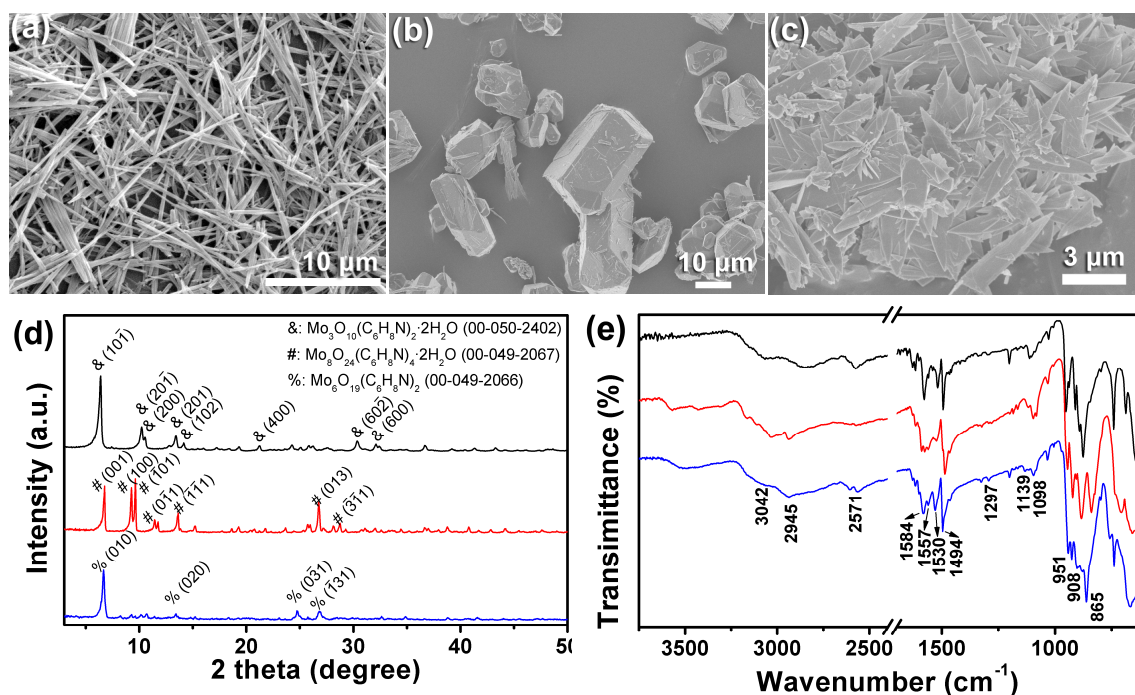

**Fig. S1** SEM images of (a)  $\text{Mo}_3\text{O}_{10}(\text{C}_6\text{H}_5\text{NH}_3)_2 \cdot 2\text{H}_2\text{O}$  nanowires, (b)  $\text{Mo}_8\text{O}_{24}(\text{C}_6\text{H}_5\text{NH}_3)_4 \cdot 2\text{H}_2\text{O}$  bulks and (c)  $\text{Mo}_6\text{O}_{19}(\text{C}_6\text{H}_5\text{NH}_3)_2$  needles precursors. (d) XRD patterns and (e) FT-IR spectra of (black)  $\text{Mo}_3\text{O}_{10}(\text{C}_6\text{H}_5\text{NH}_3)_2 \cdot 2\text{H}_2\text{O}$  nanowires, (red)  $\text{Mo}_8\text{O}_{24}(\text{C}_6\text{H}_5\text{NH}_3)_4 \cdot 2\text{H}_2\text{O}$  bulks and (blue)  $\text{Mo}_6\text{O}_{19}(\text{C}_6\text{H}_5\text{NH}_3)_2$  needles. All the precursors present obvious aniline-molybdate hybrid components in their IR spectra. Taking  $\text{Mo}_6\text{O}_{19}(\text{C}_6\text{H}_5\text{NH}_3)_2$  as example, the bands around 3042 and 2945  $\text{cm}^{-1}$  are ascribed to the stretching vibration of C–H in benzene ring, and those at 1584, 1557, 1530 and 1494  $\text{cm}^{-1}$  should be assigned to the characteristic vibration of benzene ring. The absorptions at 2571 and 1139  $\text{cm}^{-1}$  are due to the stretching vibration of  $-\text{NH}_3^+$  and C–N, respectively, while the peak of 1098  $\text{cm}^{-1}$  is associated with the C–H bending vibration of benzenoid rings. Meanwhile, the stretching vibration of Mo=O and Mo–O bonds in molybdate are clearly detected at 951, 908 and 865  $\text{cm}^{-1}$ .

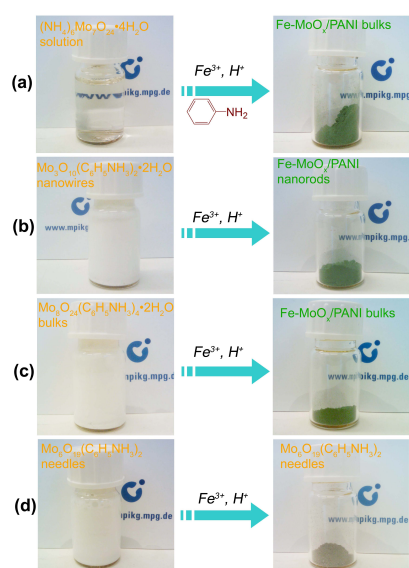

**Fig. S2** Photographs for the synthetic process employing various precursors of (a)  $(\text{NH}_4)_6\text{Mo}_7\text{O}_{24}\cdot 4\text{H}_2\text{O}$  solution, (b)  $\text{Mo}_3\text{O}_{10}(\text{C}_6\text{H}_5\text{NH}_3)_2\cdot 2\text{H}_2\text{O}$  nanowires, (c)  $\text{Mo}_8\text{O}_{24}(\text{C}_6\text{H}_5\text{NH}_3)_4\cdot 2\text{H}_2\text{O}$  bulks and (d)  $\text{Mo}_6\text{O}_{19}(\text{C}_6\text{H}_5\text{NH}_3)_2$  needles.

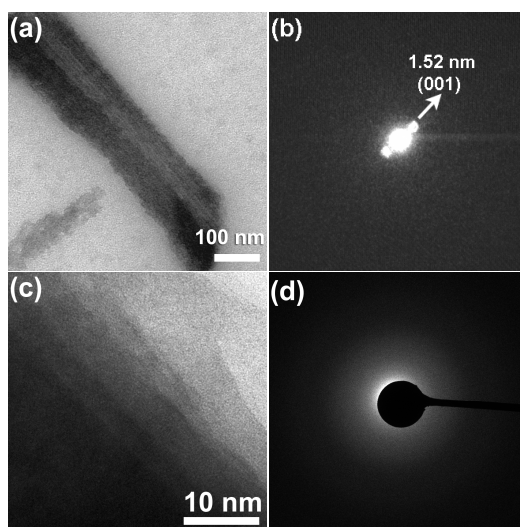

**Fig. S3** (a) TEM image, (b) SAED pattern and (c) HR-TEM image of as-obtained Fe-MoO<sub>x</sub>/PANI nanorods, and (d) SAED pattern obtained after HR-TEM. The SAED pattern (b) displays the diffraction of (001) in one dimension, which corresponds to the typical layered pattern in XRD investigation (Fig. 1d in manuscript). The HR-TEM image in c displays the ambiguous and destroyed lattice fringes, consistent with the diffused halo in its SAED pattern obtained after HR-TEM (d). It is indicated that the organic-inorganic hybrid crystal structure of Fe-MoO<sub>x</sub>/PANI nanorods is not stable under electron-beam with high energy in HR-TEM.

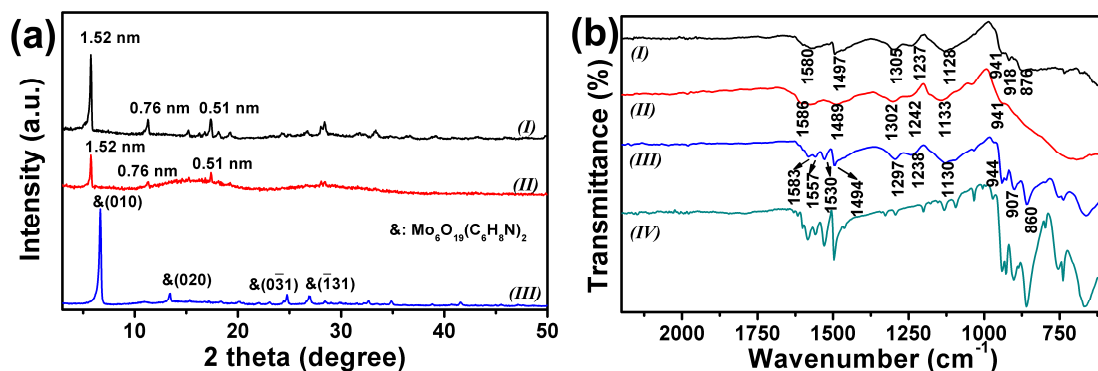

**Fig. S4** (a) XRD patterns and (b) IR spectra of products fabricated using (I)  $\text{Mo}_7\text{O}_{24}(\text{NH}_4)_6 \cdot 4\text{H}_2\text{O}$ , (II)  $\text{Mo}_8\text{O}_{26}(\text{C}_6\text{H}_5\text{NH}_3)_4 \cdot 2\text{H}_2\text{O}$  bulks and (III)  $\text{Mo}_6\text{O}_{19}(\text{C}_6\text{H}_5\text{NH}_3)_2$  needles as precursors. The curve IV in b is the IR spectrum of  $\text{Mo}_6\text{O}_{19}(\text{C}_6\text{H}_5\text{NH}_3)_2$  precursor.

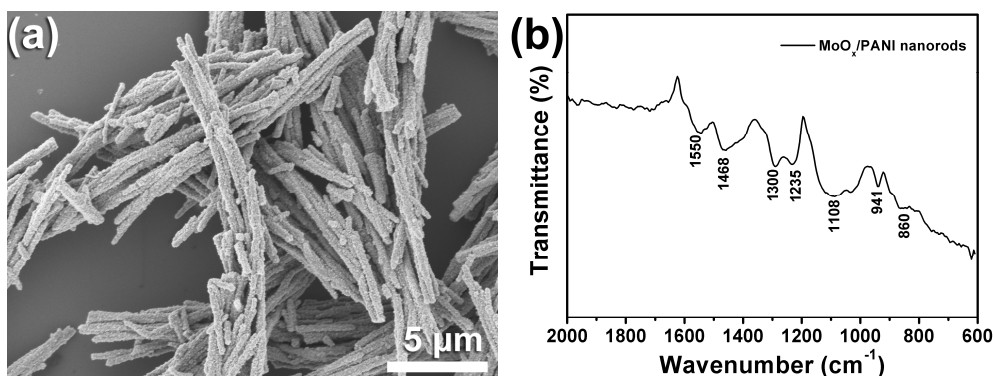

**Fig. S5** (a) SEM image and (b) FT-IR spectrum of  $\text{MoO}_x/\text{PANI}$  nanorods synthesized from  $\text{Mo}_3\text{O}_{10}(\text{C}_6\text{H}_5\text{NH}_3)_2 \cdot 2\text{H}_2\text{O}$  nanowires using  $(\text{NH}_4)_2\text{S}_2\text{O}_8$  as initiator. In IR spectrum, the absorptions at 1550 and 1468  $\text{cm}^{-1}$  are associated with the stretching vibration of quinonoid and benzenoid rings, respectively. The peaks at 1300 and 1235  $\text{cm}^{-1}$  are assigned to C-N stretching vibration in quinonoid–benzenoid–quinonoid and benzenoid units, and the peak at 1108  $\text{cm}^{-1}$  is attributed to bending vibrations of C-H in quinonoid and benzenoid rings. On the other hand, the bands at 941 and 860  $\text{cm}^{-1}$  are associated with the stretching vibration of Mo=O and Mo-O-Mo in molybdate.



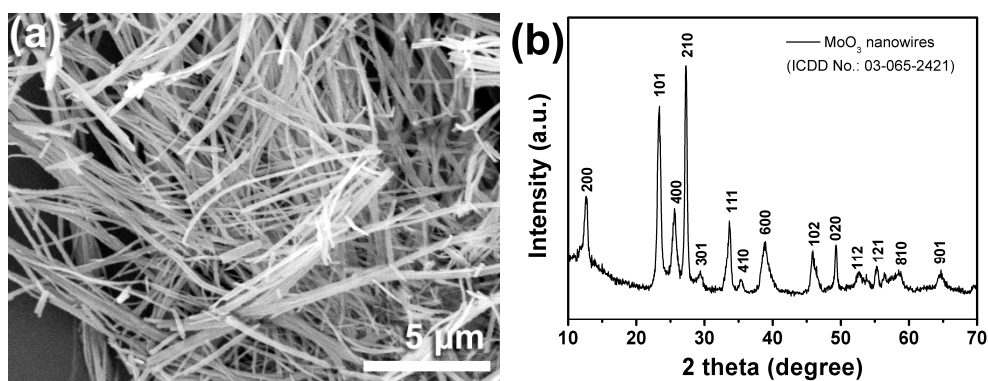

**Fig. S6** (a) SEM image and (b) XRD pattern of MoO<sub>3</sub> nanowires obtained through calcining Mo<sub>3</sub>O<sub>10</sub>(C<sub>6</sub>H<sub>5</sub>NH<sub>3</sub>)<sub>2</sub>·2H<sub>2</sub>O nanowires under air flow at 400°C for 5 hours.

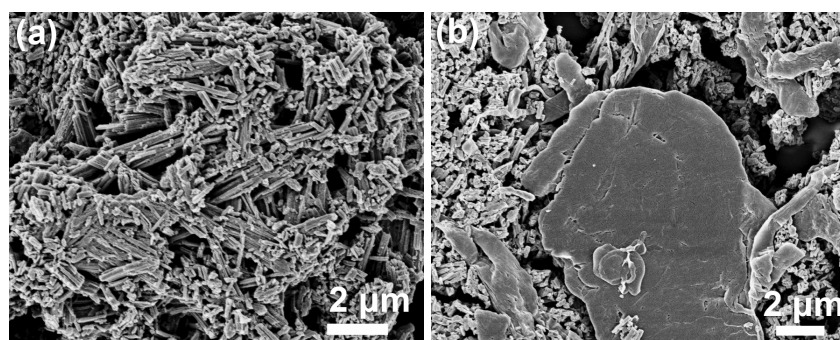

**Fig. S7** SEM images of (a) Fe-MoO<sub>x</sub>/PANI and (b) MoO<sub>x</sub>/PANI nanorods after 3<sup>rd</sup> cycle for cyclooctene epoxidation.
